# Supplementary material for: Ferroportin disease: A systematic meta-analysis of clinical and molecular findings
Source: PubMed Central journal article supplement (PMC2956830; doi:10.1016/j.jhep.2010.05.016), 2010-11
Supplement: mmc1.pdf [file mmc1.pdf]

| Reference             | mutation (protein) | mutation (cDNA level)        | age | sex | Hb (g/dl) | ferritin (µg/L) | transferrin saturation (%) | iron removed | Fibrosis (ISAHK) | Cirrhosis | HII  | HIC (µmol/g) | MRI                 | viral hepatitis | steatosis | BMI     | metabolic syndrome | Ethanol (g/week) | other comorbidity | Biopsied                                                                         | Histology M = Kupffer cells exclusively or prominent H = both or hepatocellular only |
|-----------------------|--------------------|------------------------------|-----|-----|-----------|-----------------|----------------------------|--------------|------------------|-----------|------|--------------|---------------------|-----------------|-----------|---------|--------------------|------------------|-------------------|----------------------------------------------------------------------------------|--------------------------------------------------------------------------------------|
| Subramaniam GUT 05    | A77D               | c.230C>A                     | 45  | m   | 12.2      | 3340            | 29                         | n.a.         | 0                | 0         | 2.1  | 96           |                     | no              | no        | normal  | neg                | 20               |                   | Kupffer cell iron loading, min Hep                                               | M                                                                                    |
| Lim BCM2D 2008        | A77D               | c.230C>A                     | 36  | m   |           | 4000            | 45                         | yes          | 0                |           |      | 156,25       |                     | no              | no        |         | neg                |                  |                   | prominent kupffer cell siderosis, grade 2 hep siderosis                          | M                                                                                    |
| Lim BCM2D 2008        | A77D               | c.230C>A                     | 34  | m   |           | 4050            | 54                         | yes          | 1                |           |      | 368,4        |                     | no              | no        |         |                    |                  |                   | prominent kupffer cell siderosis, grade 3 hep siderosis                          | M                                                                                    |
| Pietrangolo NEJM 99   | A77D               | c.230C>A                     | 61  | f   | 14.5      | 5846            | 89                         | 12           | 1                |           | 5.1  | 310          |                     | no              | no        |         |                    | <70              |                   | mixed: hep, reticuloendothelial                                                  | H                                                                                    |
| Pietrangolo NEJM 99   | A77D               | c.230C>A                     | 59  | m   | 16        | 5750            | 75                         | 35           | 1                |           | 10.9 | 646          |                     | no              | no        |         |                    | <70              |                   | mixed: hep, reticuloendothelial                                                  | H                                                                                    |
| Pietrangolo NEJM 99   | A77D               | c.230C>A                     | 30  | m   | 14.3      | 5600            | 88                         | 16           | 1                |           | 27.2 | 815          |                     | no              | no        |         |                    | <70              |                   | mixed: hep, reticuloendothelial                                                  | H                                                                                    |
| Pietrangolo NEJM 99   | A77D               | c.230C>A                     | 34  | m   | 15.7      | 2410            | 60                         | 31           | 0                |           | 23.8 | 810          |                     | no              | no        |         |                    | <70              |                   | mixed: hep, reticuloendothelial                                                  | H                                                                                    |
| Pietrangolo NEJM 99   | A77D               | c.230C>A                     | 20  | m   | 15        | 2700            | 40                         | 12           | 0                |           | 11   | 220          |                     | no              | no        |         |                    | <70              |                   | mixed: hep, reticuloendothelial                                                  | H                                                                                    |
| Pietrangolo NEJM 99   | A77D               | c.230C>A                     | 21  | f   | 14.2      | 890             | 30                         | 6            | 0                |           | 5.2  | 110          |                     | no              | no        |         |                    | <70              |                   | mixed: hep, reticuloendothelial                                                  | H                                                                                    |
| Pietrangolo NEJM 99   | A77D               | c.230C>A                     | 37  | m   | 15        | 3250            | 65                         | 20           | 0                |           | 28.4 | 1050         |                     | no              | no        |         |                    | <70              |                   | mixed: hep, reticuloendothelial                                                  | H                                                                                    |
| Pietrangolo NEJM 99   | A77D               | c.230C>A                     | 14  | m   | 13.8      | 815             | 28                         | 4            | 0                |           | 5.4  | 75           |                     | no              | no        |         |                    | <70              |                   | mixed: hep, reticuloendothelial                                                  | H                                                                                    |
| Liu Int Med 05        |                    | c.117A>G                     | 43  | f   |           | 9660            | 92                         | yes          | 0                |           |      |              | liver/spleen        | no              |           |         | imp Glc Tol        | 0                |                   | mixed: hep&Kupff                                                                 | H                                                                                    |
| Sham BCM2D 05         | C326S              | c.977G>C                     | 35  | m   |           |                 |                            | yes          | 0                | 1         |      |              |                     |                 |           |         |                    |                  |                   | marked Hep iron                                                                  | H                                                                                    |
| Sham BCM2D 05         | C326S              | c.977G>C                     | 16  | f   |           |                 |                            | yes          | 0                |           | 2.3  |              |                     |                 |           |         |                    |                  |                   | marked Hep iron                                                                  | H                                                                                    |
| Sham BCM2D 05         | C326S              | c.977G>C                     | 16  | m   |           |                 |                            | yes          | 0                |           |      |              |                     |                 |           |         |                    |                  |                   | marked Hep iron                                                                  | H                                                                                    |
| Cemones BJH 05        | D181V              | c.846A>T                     | 40  | m   |           | 1400            | 40                         | yes          | 0                |           |      |              |                     |                 |           |         |                    |                  |                   | mixed: hep & kupffer                                                             | H                                                                                    |
| Lee ActHaem 2007      |                    | splice site (prec.c.1402G>A) | 59  | m   |           | 1364            | 25                         | yes          | 0                |           |      |              |                     |                 | mild      |         | DM, Hyperlipid.    | 0                |                   | mixed: hep & kupffer                                                             | H                                                                                    |
| Jouanolle JHep 03     | G490D              | c.1468G>A                    | 54  | f   | 14.2      | 8943            | 53                         | yes          | 0                |           | 6.4  | 347          | 1                   |                 |           |         |                    |                  |                   | mixed: hep & kupffer                                                             | H                                                                                    |
| De Domenico Haemat 06 | G90S               | c.238G>A                     | 34  | m   | 15.8      | 4420            | 60                         | n.a.         | 0                |           |      | 954          |                     |                 |           |         |                    |                  |                   | yes                                                                              | H                                                                                    |
| Girelli JHep 08       | I152F              | c.758A>T                     | 59  | f   |           | 1771            | 22,7                       | yes          | 2                |           |      |              | liver               | HCV             | mild      | 29      | DM                 | no               |                   | Kupffer cell iron loading, min Hep                                               | M                                                                                    |
| Girelli JHep 08       | L233P              | c.1012T>C                    | 59  | m   |           | 9000            | 74,8                       | yes          | 1                |           |      |              | liver/spleen        |                 | grade 1   |         |                    | 140              |                   | Hepatocellular iron                                                              | H                                                                                    |
| Njaou BCM2D 02        | N144H              | c.430A>G                     | 76  | n/a |           | 219             | 40,4                       | no           | 0                | 1         |      |              |                     |                 | yes       |         |                    | abuse            |                   | mixed                                                                            | H                                                                                    |
| Njaou BCM2D 02        | N144H              | c.430A>G                     | 64  | n/a |           | 223             | 34,4                       | na           | 0                | 1         |      |              |                     |                 | yes       | obesity |                    |                  |                   | mixed                                                                            | H                                                                                    |
| Njaou BCM2D 02        | N144H              | c.430A>G                     | 63  | n/a |           | 113             | 17                         | yes          | 1                |           | 27.5 |              |                     |                 |           |         |                    |                  |                   | mixed                                                                            | H                                                                                    |
| Njaou BCM2D 02        | N144H              | c.430A>G                     | 80  | n/a |           | 133             | 27,9                       | yes          | 1                |           | 12,3 |              |                     |                 |           |         |                    |                  |                   | mixed                                                                            | H                                                                                    |
| Njaou BCM2D 02        | N144H              | c.430A>G                     | 69  | n/a |           | 35              | 34                         | yes          | 1                |           | 12,8 |              |                     |                 |           |         | DM                 |                  |                   | mixed                                                                            | H                                                                                    |
| Njaou BCM2D 02        | N144H              | c.430A>G                     | 66  | n/a |           |                 |                            | yes          | 1                |           |      |              |                     |                 | yes       |         | DM                 |                  |                   | mixed                                                                            | H                                                                                    |
| Njaou BCM2D 02        | N144H              | c.430A>G                     | 53  | n/a |           | 31              | 24,1                       | yes          | 0                |           |      |              |                     |                 |           | obesity |                    |                  |                   | mixed                                                                            | H                                                                                    |
| Njaou BCM2D 02        | N144H              | c.430A>G                     | 45  | n/a |           | 180             | 23,1                       | yes          | 1                |           |      |              |                     |                 |           | obesity |                    |                  |                   | mixed                                                                            | H                                                                                    |
| Wallace JHep 04       | N144D              | c.430A>G                     | 32  | m   |           | 10510           | 99                         | yes          | 0                |           | 12,3 | 393          | 0                   |                 |           |         |                    |                  | Sarcoidosis       | Hepatocellular iron                                                              | H                                                                                    |
| Arden GUT 03          | N144T              | c.431A>C                     | 48  | m   |           | 2937            | 80                         | no           | 0                |           | 7,6  | 363          |                     |                 |           |         |                    |                  |                   | grade 4 hep iron, significant kupffer cell iron                                  | M                                                                                    |
| De Domenico Haemat 06 | N174I              | c.521A>T                     | 66  | f   | 14,9      | 5815            | 48                         | n.a.         | 0                |           |      | 450          |                     |                 |           |         |                    |                  |                   | no hist info                                                                     |                                                                                      |
| De Domenico Haemat 06 | N174I              | c.521A>T                     | 38  | f   | 13,4      | 5430            | 45                         | n.a.         | 0                |           |      | 850          |                     |                 |           |         |                    |                  |                   | no hist info                                                                     |                                                                                      |
| Koyama Int Med 05     | R495S              | c.1467A>C                    | 43  | m   |           | 922             | 24,8                       | no           | 0                |           |      |              |                     | no              |           |         | no                 | no               |                   | selective iron deposits in kupffer cells                                         | M                                                                                    |
| Bach BCM2D 06         | R88T               | c.263G>C                     | 61  | m   |           | 9075            | 91                         | 16,5         | 1                | 0         |      |              |                     | no              |           |         | no                 | mild             |                   | severe iron deposits in both                                                     | H                                                                                    |
| Bach BCM2D 06         | R88T               | c.263G>C                     | 56  | m   |           | 2830            | 43                         | 9,5          | 1                | 0         | 200  |              |                     |                 |           |         |                    |                  |                   | severe iron deposits in both                                                     | H                                                                                    |
| Bach BCM2D 06         | R88T               | c.263G>C                     | 53  | m   |           | 5291            | 70                         | 17,7         | 1                | 0         |      |              |                     | HBV/HCV         |           |         |                    |                  |                   | severe iron deposits in both                                                     | H                                                                                    |
| Bach BCM2D 06         | R88T               | c.263G>C                     | 23  | m   |           | 1870            | 64                         | 11           | 0                |           |      |              |                     |                 |           |         |                    |                  |                   | severe iron deposits in both                                                     | H                                                                                    |
| Wallace JHep 07       | S338R              | c.1014T>G                    | 72  | m   |           | 1990            | 90                         | yes          | 0                |           | 210  | 0            |                     |                 | mild      |         | imp. glc.tol       | 175              |                   | grade 4 iron in hep, Kupff a periportal macros                                   | H                                                                                    |
| Cazzola BJH 02        | V162del            | c.484_486del3                | 31  | f   | 12        | 1396            | 15                         | no           | 0                |           |      |              |                     |                 |           |         |                    |                  |                   | selective iron deposits in kupffer cells                                         | M                                                                                    |
| Devalia Blood 02      | V162del            | c.484_486del3                | 38  | f   |           | 2855            | 40                         | yes          | 0                |           |      |              |                     |                 |           |         |                    |                  |                   | heavy iron deposits in both, kupffer and hepat                                   | H                                                                                    |
| Devalia Blood 02      | V162del            | c.484_486del3                | 34  | f   |           | 1150            | 31                         | yes          | 0                |           |      |              | 1, liver and spleen |                 |           |         |                    |                  |                   | marked iron accumulation in kupffer cells                                        | M                                                                                    |
| Rocetto Blood 02      | V162del            | c.484_486del3                | 26  | f   | 11,5      | 1022            | 18                         | yes          | 0                |           |      |              |                     |                 |           |         |                    |                  |                   | positive especially in kupffer cells, with few hepatocyte granules               | M                                                                                    |
| Wallace Blood 02      | V162del            | c.484_486del3                | 56  | m   |           | 12000           | 81                         | no           | 1                |           | 8,3  | 475          |                     |                 |           |         |                    |                  |                   | prominent kupffer cell loading in addition to hepatocell iron                    | M                                                                                    |
| Wallace Blood 02      | V162del            | c.484_486del3                | 73  | m   |           | 10000           | 81                         | no           | 1                |           |      |              |                     |                 |           |         |                    |                  |                   | prominent kupffer cell loading in addition to hepatocell iron                    | M                                                                                    |
| Wallace Blood 02      | V162del            | c.484_486del3                | 20  | m   |           | 1768            | 35                         | yes          | 1                |           | 5,2  |              |                     |                 |           |         |                    |                  |                   | prominent kupffer cell loading in addition to hepatocell iron                    | M                                                                                    |
| Wallace Blood 02      | V162del            | c.484_486del3                | 19  | f   |           | 1182            | 19                         | yes          | 0                |           | 3,5  |              |                     |                 |           |         |                    |                  |                   | prominent kupffer cell loading in addition to hepatocell iron                    | M                                                                                    |
| Wallace GUT 05        | V162del            | c.484_486del3                | 36  | f   |           | 3145            | 29                         | yes          | 0                | 0         | 9,1  | 316,1        | 1, liver            |                 |           |         | no                 |                  |                   | iron is prominent in kupffer cells and hepatocytes                               | H                                                                                    |
| Zoller Hep 05         | V162del            | c.484_486del3                | 28  | m   | 15,5      | 4935            | 23                         | no           | 0                |           |      |              |                     |                 |           |         |                    |                  |                   | predominantly in kupffer cells                                                   | M                                                                                    |
| Speletes BCM2D 08     | V162del            | c.484_486del3                | 31  | f   |           | 2419            | 22,1                       | yes          | 1                |           |      |              | 1, liver            |                 |           |         |                    |                  |                   | prominent iron in kupffer cells                                                  | M                                                                                    |
| Lim BCM2D 2008        | V162del            | c.484_486del3                | 65  | m   | 15,2      | 4559            | yes                        | 0            |                  |           | 0,80 | 52,1         |                     | neg             |           |         |                    |                  |                   | grade 3 siderosis in hepatocytes and prominent in kupffer cells                  | H                                                                                    |
| Pelucchi ClinGent 08  | V72F               | c.214G>T                     | 58  | m   | 15,7      | 1091            | 81                         | yes          | 2                | 0         | 2,7  | 160          |                     |                 |           |         |                    | regular drinks   |                   | largely hepatocytes but also kupffer cells                                       | H                                                                                    |
| Pelucchi ClinGent 08  | V72F               | c.214G>T                     | 48  | m   | 15,4      | 956             | 73                         | yes          | 3                |           | 2,5  | 120          |                     |                 |           |         |                    |                  |                   | largely hepatocytes but also kupffer cells                                       | H                                                                                    |
| Rivard BJH 03         | Y64N               | c.190T>C                     | 56  | m   |           | 1759            | 96                         | yes          | 1                |           |      |              |                     |                 |           |         |                    |                  |                   | iron deposition hepatocytes and kupffer cells                                    | H                                                                                    |
| Rivard BJH 03         | Y64N               | c.190T>C                     | 24  | m   |           | 647             | 98                         | yes          | 0                |           |      |              | 1, liver            |                 |           |         |                    |                  |                   | iron deposition hepatocytes and kupffer cells                                    | H                                                                                    |
| Rivard BJH 03         | Y64N               | c.190T>C                     | 30  | f   |           | 176             | 47                         | no           | 0                |           |      |              |                     |                 |           |         |                    |                  |                   | iron deposition hepatocytes and kupffer cells                                    | H                                                                                    |
| Cunat ClinChem 2007   | G490S              | c.1468G>A                    | 71  | f   |           | 2710            | 83                         | unknown      | 0                |           |      | 350          |                     |                 |           |         |                    |                  |                   | yes                                                                              | M                                                                                    |
| Cunat ClinChem 2007   | G490S              | c.1468G>A                    | 24  | m   |           | 1262            | 32                         | unknown      | 0                |           |      |              |                     |                 |           |         |                    |                  |                   | yes                                                                              | M                                                                                    |
| Cunat ClinChem 2007   | R89G               | c.262A>G                     | 41  | m   |           | 2200            | yes                        | 1            |                  |           |      | 65           |                     |                 |           |         |                    |                  |                   | mixed1                                                                           | M                                                                                    |
| Cunat ClinChem 2007   | S UTR              | c.[59_45del]                 | 73  | m   |           | 1400            | 80                         | yes          | 0                |           |      | 240          |                     |                 |           |         |                    |                  |                   | yes                                                                              | M                                                                                    |
| Griffith              | R489K              | c.1466G>A                    | 54  | m   |           | 3400            | yes                        | 0            | 0                |           |      |              |                     |                 |           |         |                    |                  |                   | grade 1 hepatocytes strong kupffer cell                                          | H                                                                                    |
| Lutocart BJH 2009     | Y501C              | c.1502A>G                    | 35  | m   | 15,3      | 642             | 94                         | no           | 0                |           |      |              | 1, liver no spleen  | neg             |           |         |                    |                  |                   | significant hepatocellular iron overload, although kupffer cell was also evident | H                                                                                    |
